# Supplementary material for: From cradle to grave: neurogenesis, neuroregeneration and neurodegeneration in Alzheimer’s and Parkinson’s diseases
Source: PubMed Central journal article supplement — Neural Regen Res. 2022 Apr 29;17(12):2606–14. doi: 10.4103/1673-5374.336138 (PMC9165389; doi:10.4103/1673-5374.336138), 2022-04-29
Supplement: NRR-17-2606_Suppl1.pdf [file NRR-17-2606_Suppl1.pdf]

### OPEN PEER REVIEW REPORT

**Name of journal:** Neural Regeneration Research

**Manuscript NO:** NRR-D-21-00816

**Title:** From Cradle to Grave: Neurogenesis, Neuroregeneration and Neurodegeneration in Alzheimer's and Parkinson's disease

**Reviewer's Name:** Jianjun Wu (Huashan Hospital Affiliated to Fudan University)

**Reviewer's country:** CHINA

**Date sent for review:** 2021-10-15

**Date reviewed:** 2021-10-18

**Review time:** 3 Days

1. Do you consider this paper is hotspots or important areas in the research field related to neural regeneration?

Research on neurodegenerative diseases has always been a hot spot in brain science.

2. Which area do you think this paper falls into? Neurorepair, neuroprotection, neuroregeneration or neuroplasticity.

neurogenesis, neuroregeneration

3. Is the manuscript presented in an intelligible fashion and written in standard English?

From the headline, readers can be aware of the obstacles to the development of neuroregenerative therapies.

4. Your peer review comments may be published as an open peer review report. Do you agree to have your name included with the published article? (The goal of the pilot is simple: make the peer-review process more transparent and improve the recognition reviewers receive for their work.)

YES

| Manuscript Rating Question(s):                                                          | Scale | Rating |
|-----------------------------------------------------------------------------------------|-------|--------|
| The information presented was new. (5 as the best score)                                | [1-5] | 4      |
| The subject addressed in this article is worthy of investigation. (3 as the best score) | [1-3] | 3      |

### COMMENTS TO AUTHORS

There are several minor problems:

1. The abbreviation "APP" in line 17 lacked the full name;
2. Line 28, Santiago Ramón Y Cajal, not "y"
3. "notch" in line 51 should be "Notch"
